# Supplementary material for: Serum metabolic signatures for Alzheimer’s Disease reveal alterations in amino acid composition: a validation study
Source: PubMed Central journal article supplement (PMC10770204; doi:10.1007/s11306-023-02078-8), 2024-01-05

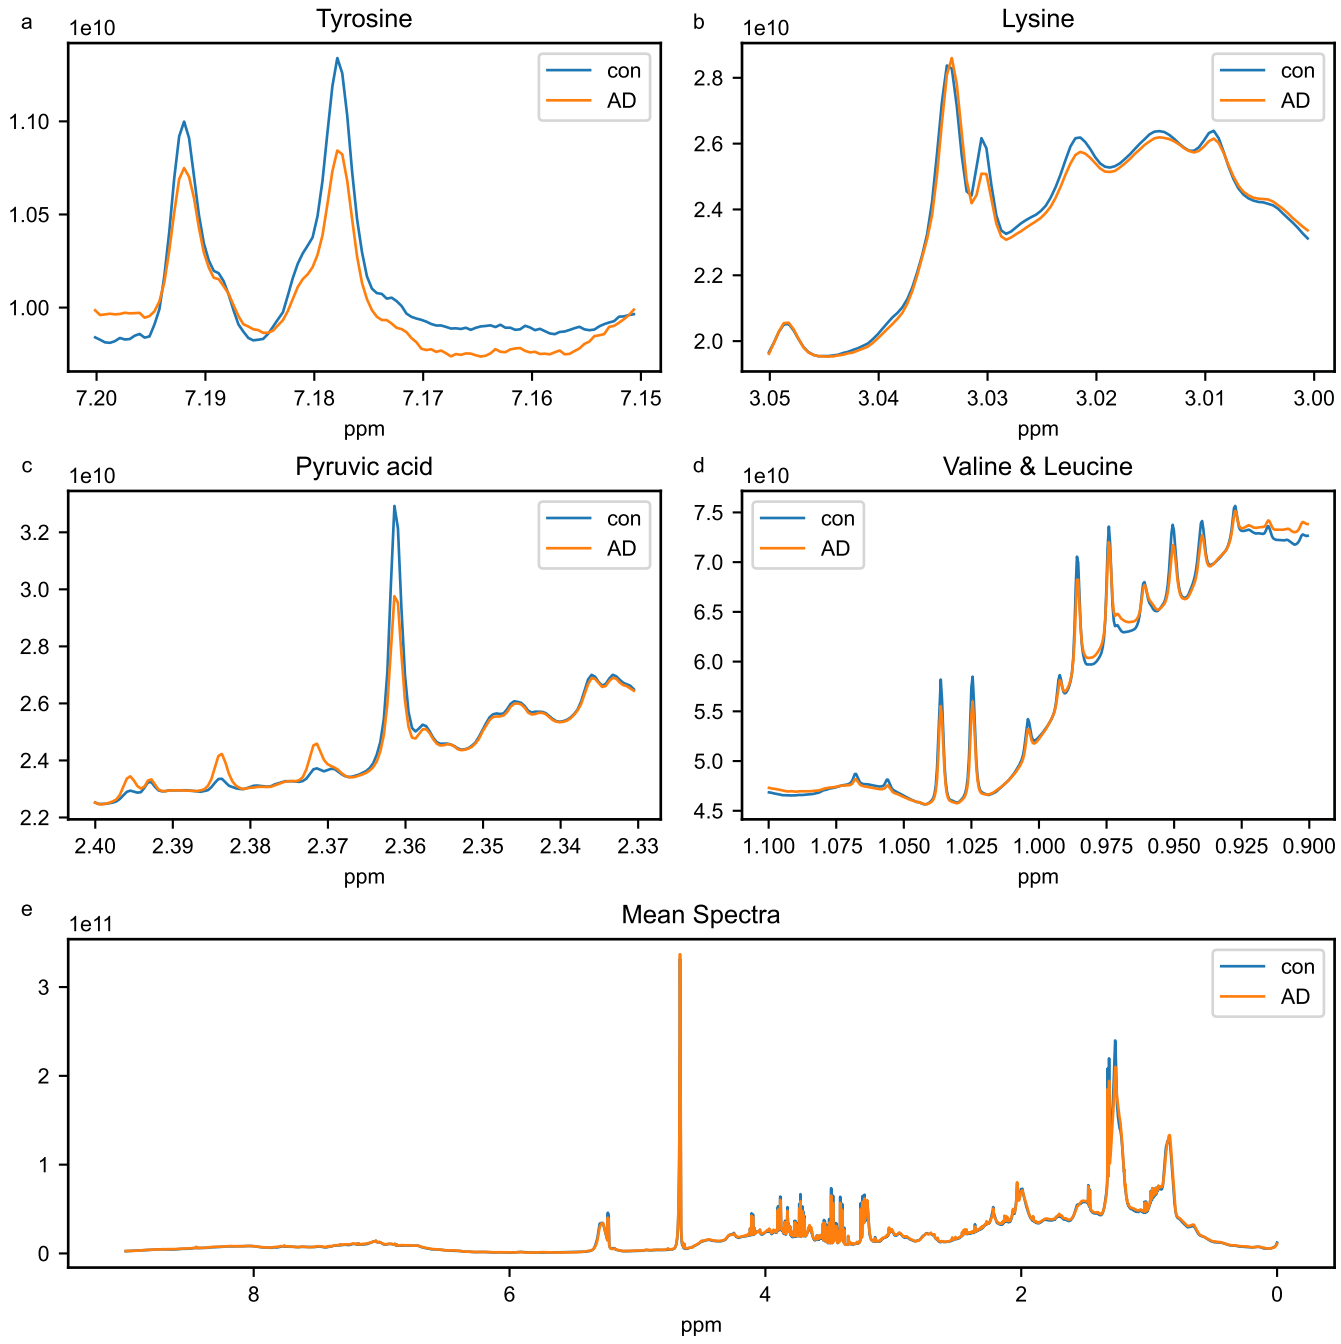

Supplement: 11306_2023_2078_MOESM1_ESM.pdf [file 11306_2023_2078_MOESM1_ESM.pdf]
